# Supplementary material
Source: publisher figshare collection journal article supplement (https://frontiersin.figshare.com/ndownloader/files/17562293)
Supplement: Supplementary file 1 [file 17562293]

## Supporting Information

# **Gas sorption properties of a new three-dimensional In-ABDC MOF with a diamond net**

In-Hwan Choi,<sup>a</sup> Suk Bin Yoon,<sup>a</sup> So-Young Jang,<sup>a</sup> Seong Huh,<sup>a\*</sup>

Sung-Jin Kim,<sup>b</sup> and Youngmee Kim<sup>b\*</sup>

<sup>a</sup>Department of Chemistry and Protein Research Center for Bio-Industry, Hankuk University of Foreign Studies, Yongin 17035, Korea

<sup>b</sup>Department of Chemistry and Nano Science and Institute of Nano-Bio Technology, Ewha Womans Univeristy, Seoul 03760, Korea

Correspondence and requests for materials should be addressed to Y.K. (email: ymeekim@ewha.ac.kr), to S.H. (email: shuh@hufs.ac.kr).

## **Calculation of isosteric heats of CO<sub>2</sub> adsorption**

### **(1) Method 1 (Clausius-Clapeyron equation):**

The subroutine implemented in the BEL Master program (BEL Japan) was used. The adsorption data measured at 273 and 298 K were used.

### **(2) Method 2 (Virial method):**

In order to calculate the isosteric heat of adsorption ( $Q_{st}$ ) using virial-type of equation. The following Clausius-Clapeyron equation (1) was used for the estimation of  $Q_{st}$ .

$$-Q_{st} = -RT^2 \frac{\partial \ln(P)}{\partial T} \quad (1)$$

The following virial-type of equation (2) was used for the curve fitting of combined adsorption data obtained at 273 and 298 K (OriginPro 8.1).

$$\ln(P) = \ln(n) + \frac{1}{T} \sum_{i=0}^j a_i n^i + \sum_{i=0}^k b_i n^i \quad (2)$$

The resulting polynomial coefficients are used for the calculation of the following equation (3) to get adsorption enthalpy. R is the universal gas constant.

$$-Q_{st} = -R \sum_{i=0}^j a_i n^i \quad (3)$$

## ToposPro result

#####  
1:C28 H16 In N4 O8  
#####

### Topology for In1

-----  
Atom In1 links by bridge ligands and has  
Common vertex with

|      |        |        |        |           | R(A-A)  | f |
|------|--------|--------|--------|-----------|---------|---|
| In 1 | 1.0000 | 0.1268 | 1.2500 | ( 0 0 0)  | 17.248A | 1 |
| In 1 | 0.0000 | 0.1268 | 0.2500 | (-1 0 -1) | 17.248A | 1 |
| In 1 | 0.5000 | 0.6268 | 0.2500 | ( 1 1 1)  | 17.254A | 1 |
| In 1 | 0.5000 | 0.6268 | 1.2500 | ( 1 1 2)  | 17.254A | 1 |

-----

### Structural group analysis

#### ----- Structural group No 1 -----

Structure consists of 3D framework with InO8N4C28H16

### Coordination sequences

-----  
In1: 1 2 3 4 5 6 7 8 9 10  
Num 4 12 24 42 64 92 124 162 204 252  
Cum 5 17 41 83 147 239 363 525 729 981  
-----

TD10=981

### Vertex symbols for selected sublattice

-----  
In1 Point symbol: {6^6}  
Extended point symbol: [6(2).6(2).6(2).6(2).6(2).6(2)]  
-----

Point symbol for net: {6^6}  
4-c net; uninodal net

Topological type: dia Diamond; 4/6/c1; sqc6 (topos&RCSR.ttd) {6^6} - VS [6(2).6(2).6(2).6(2).6(2).6(2)]  
(17092 types in 3 databases)  
Elapsed time: 10.55 sec.

**Table S1.** Selected bond distances (Å) for **I**.

|              |           |              |           |
|--------------|-----------|--------------|-----------|
| In(1)-O(1)#1 | 2.223(3)  | In(1)-O(2)#1 | 2.302(3)  |
| In(1)-O(1)   | 2.223(3)  | In(1)-O(2)   | 2.302(3)  |
| In(1)-O(3)   | 2.233(4)  | In(1)-O(4)#1 | 2.310(3)  |
| In(1)-O(3)#1 | 2.233(4)  | In(1)-O(4)   | 2.310(3)  |
| N(1)-N(1)#2  | 1.114(12) | N(2)-N(2)#3  | 1.108(15) |

**Table S2.** Low-pressure CO<sub>2</sub> adsorption on MOFs [R1].

| MOFs <sup>[a]</sup>                                    | CO <sub>2</sub> (cm <sup>3</sup> /g) | Temp. (K) | Pressure | References |
|--------------------------------------------------------|--------------------------------------|-----------|----------|------------|
| Zn(PYDC)(dma)                                          | 140                                  | 195       | 100 kPa  | R2         |
| Zn <sub>2</sub> (cnc) <sub>2</sub> (dpt)               | 145                                  | 195       | 1 atm    | R3         |
| Zn(dtp)                                                | 99                                   | 195       | 1 atm    | R4         |
| Zn(ABDC)(bpe) <sub>0.5</sub>                           | 130                                  | 195       | 1 bar    | R5         |
| Cu(fma)(bpe) <sub>0.5</sub>                            | 100                                  | 195       | 1 bar    | R6         |
| Zn <sub>3</sub> (ntb) <sub>2</sub>                     | 151                                  | 195       | 1 atm    | R7         |
| Mn(HCOO) <sub>2</sub>                                  | 105                                  | 195       | 1 atm    | R8         |
| Zn(1,4-NDC)(bpa)                                       | 79.6                                 | 195       | 1 atm    | R9         |
| Zn(DABCO)(3,3'-TPDC)                                   | 69                                   | 196       | 1 atm    | R10        |
| [Cu <sub>5</sub> (Tz) <sub>9</sub> ][NO <sub>3</sub> ] | 49.7                                 | 195       | 1 atm    | R11        |
| Cu <sub>2</sub> (Glu) <sub>2</sub> (bpa)               | 70.0                                 | 196       | 1 atm    | R12        |
| Cu <sub>2</sub> (Glu) <sub>2</sub> (bpp)               | 100.0                                | 196       | 1 atm    | R12        |
| Zn(Glu)(bpe)                                           | 76.0                                 | 196       | 1 atm    | R13        |

[a] PYDC = 3,5-pyridinedicarboxylate; dma = *N,N'*-dimethylacetamide; cnc = 4-carboxycinnamic; dpt = 3,6-di-4-pyridyl-1,2,4,5-tetrazine; dtp = 2,3-di(tetrazolate-5-yl)pyrazine; ABDC = 4,4'-azobenzenedicarboxylate; bpe = 1,2-bis(4-pyridyl)ethylene; fma = fumarate; ntb = 4,4',4''-nitrilotrisbenzoate; 1,4-NDC = 1,4-naphthalenedicarboxylate; bpa = 1,2-bis(4-pyridyl)ethane; DABCO = 1,4-diazabicyclo[2,2,2]octane; 3,3'-TPDC = terphenyl-3,3'-dicarboxylate; Tz = tetrazolate; Glu = glutarate; bpp = 1,2-bis(4-pyridyl)propane.

**Table S3.** Low-pressure hydrogen adsorption on MOFs at 77 K and 1 atm [R14].

| MOFs <sup>[a]</sup>                                                                       | Surface area (m <sup>2</sup> /g) | H <sub>2</sub> (wt.%) | References |
|-------------------------------------------------------------------------------------------|----------------------------------|-----------------------|------------|
| Zn <sub>4</sub> O(1,4-BDC) <sub>3</sub> , MOF-5                                           | 2900 (BET)                       | 1.32                  | R15        |
| Zn <sub>4</sub> O(C <sub>8</sub> H <sub>3</sub> BrO <sub>4</sub> ) <sub>3</sub> , IRMOF-2 | 1722 (BET)                       | 1.20                  | R16        |
| Zn <sub>4</sub> O(C <sub>8</sub> H <sub>5</sub> NO <sub>4</sub> ) <sub>3</sub> , IRMOF-3  | 3563 (Langmuir)                  | 1.40                  | R17        |
| Zn <sub>4</sub> O(2,6-NDC) <sub>3</sub> , IRMOF-8                                         | 1466 (Langmuir)                  | 1.50                  | R15        |
| Zn <sub>4</sub> O(BTB) <sub>3</sub> , MOF-177                                             | 4526 (Langmuir)                  | 1.25                  | R15        |
| Zn <sub>2</sub> (1,4-BDC) <sub>2</sub> (DABCO)                                            | 1450 (BET)                       | 2.00                  | R18        |
| Zn <sub>2</sub> (2,6-NDC) <sub>2</sub> (DABCO)                                            | 1000 (BET)                       | 1.70                  | R19        |
| Mn(HCO <sub>2</sub> ) <sub>2</sub>                                                        | 297 (BET)                        | 0.90                  | R20        |
| Mn <sub>3</sub> (BDT) <sub>3</sub>                                                        | 290 (BET)                        | 0.97                  | R21        |
| Cu <sub>3</sub> (BTC) <sub>2</sub> , HKUST-1                                              | 1239 (BET)                       | 2.18                  | R22        |
| Cu <sub>3</sub> (TATB) <sub>2</sub> (H <sub>2</sub> O) <sub>3</sub>                       | 3800 (Langmuir)                  | 1.91                  | R23        |
| Ni(cyclam)(BPYDC)                                                                         | 817 (Langmuir)                   | 1.10                  | R24        |
| Mg <sub>3</sub> (2,6-NDC) <sub>3</sub>                                                    | 190 (BET)                        | 0.48                  | R25        |
| [Et <sub>2</sub> NH <sub>2</sub> ][In(2,6-NDC) <sub>2</sub> ]                             | 891 (BET)                        | 1.62                  | R26        |
| [Me <sub>2</sub> NH <sub>2</sub> ][In(BPDC) <sub>2</sub> ]                                | 638 (BET)                        | 0.66                  | R27        |

[a] 1,4-BDC = 1,4-benzenedicarboxylate; 2,6-NDC = 2,6-naphthalenedicarboxylate; BTB = 1,3,5-benzenetribenzoate; DABCO = 1,4-diazabicyclo[2,2,2]octane; BDT = 1,4-benzeneditetrazolate; BTC = 1,3,5-benzenetricarboxylate; TATB = 4,4',4''-s-triazine-2,4,6-triyltribenzoate; cyclam = 1,4,8,11-tetraazacyclotetradecane; BPYDC = 2,2'-bipyridyl-5,5'-dicarboxylate; BPDC = 4,4'-biphenyldicarboxylate.

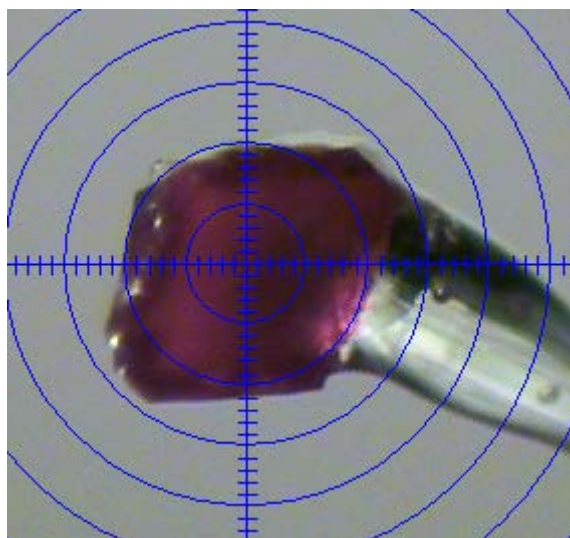

**Figure S1.** Crystal shape of **I**.

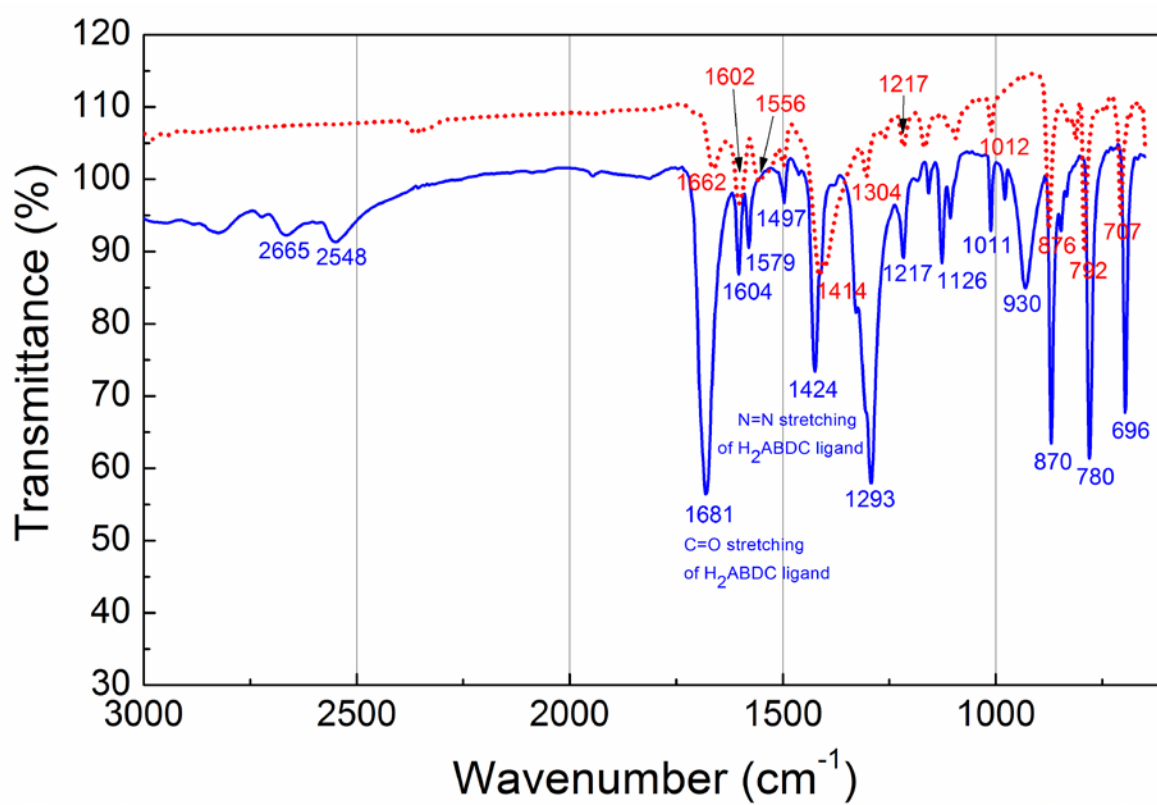

**Figure S2.** FT-IR spectra of free  $\text{H}_2\text{ABDC}$  (blue solid line) and as-prepared **I** (red dotted line).

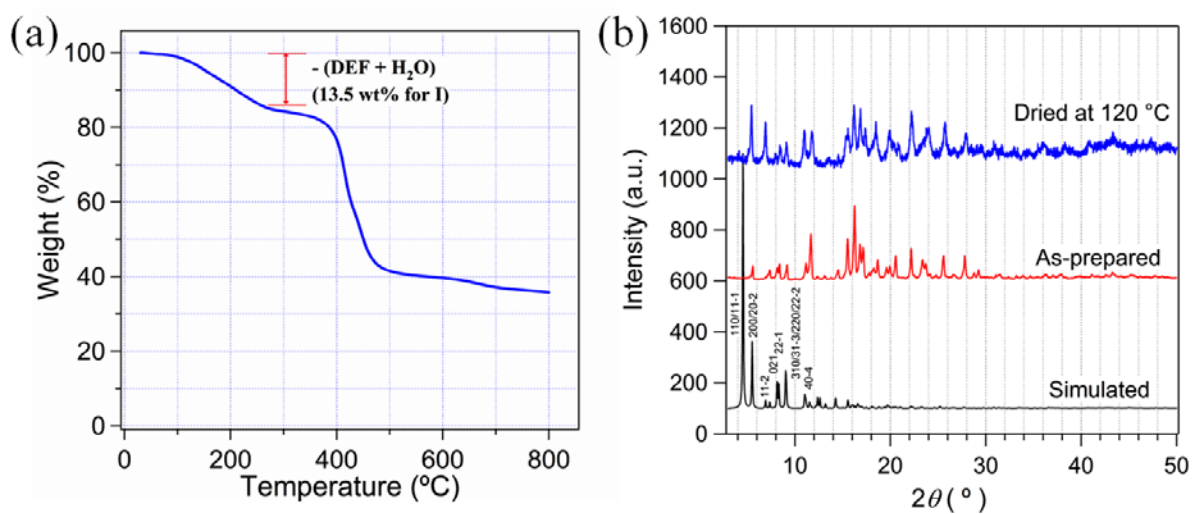

**Figure S3.** TG curve for the as-prepared **I** (a) and PXRD patterns (b).

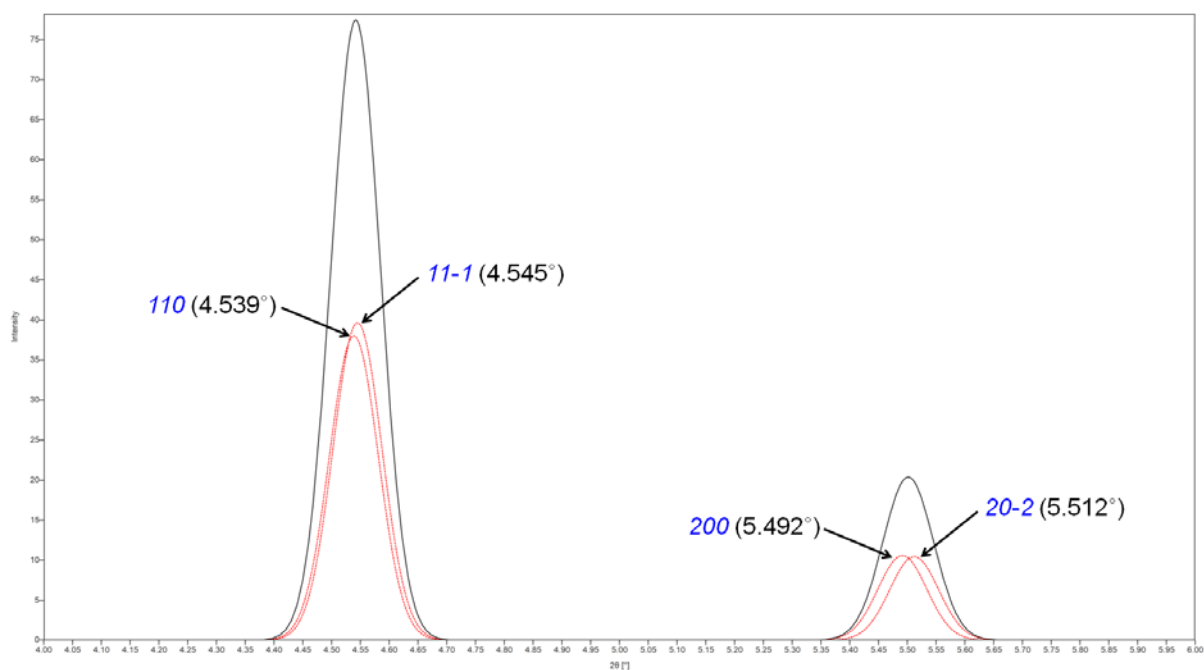

**Figure S4.** Expanded view of the low-angle region of PXRD pattern calculated from X-ray crystal structure of the as-prepared **I**. Two almost identical  $2\theta$  angles of (110) and (11-1) planes are clearly seen.



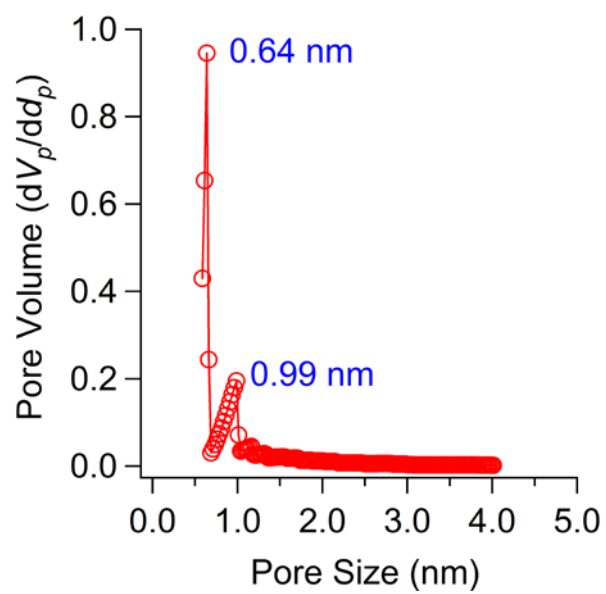

**Figure S5.** The Horváth-Kawazoe (HK) pore size distribution of solvent-free **I**.



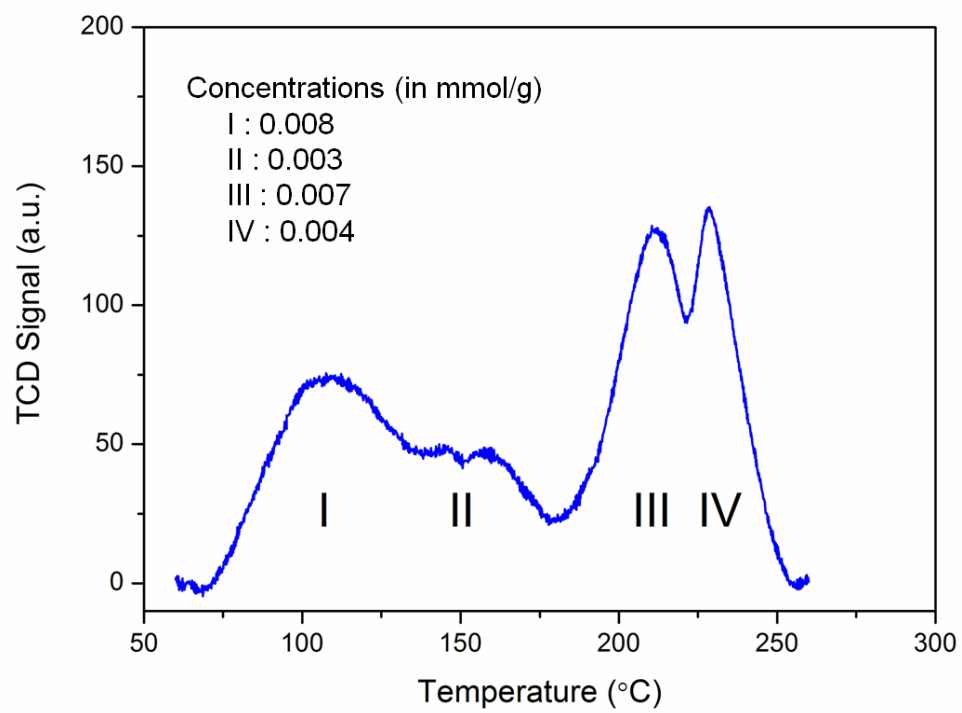

**Figure S7.** CO<sub>2</sub>-TPD profile of the solvent-free **I**.

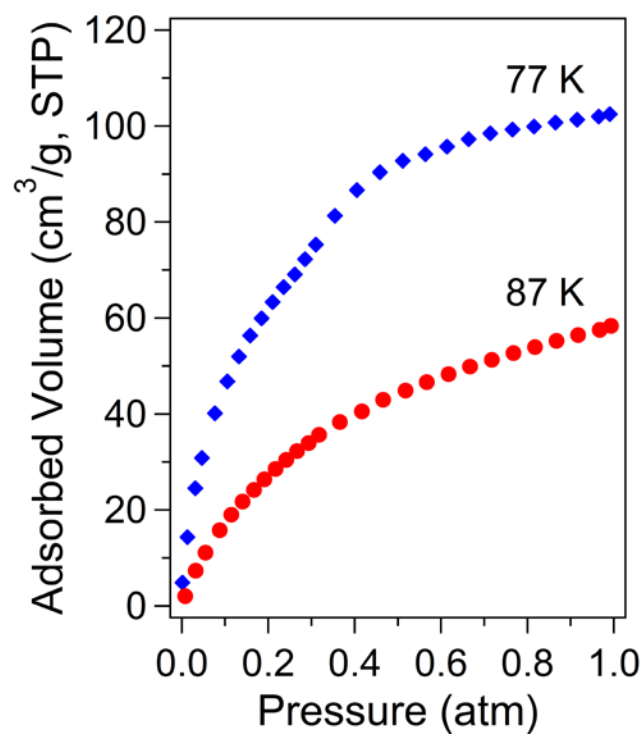

**Figure S8.** H<sub>2</sub> adsorption isotherms measured at 77 and 87 K for the solvent-free **I**.

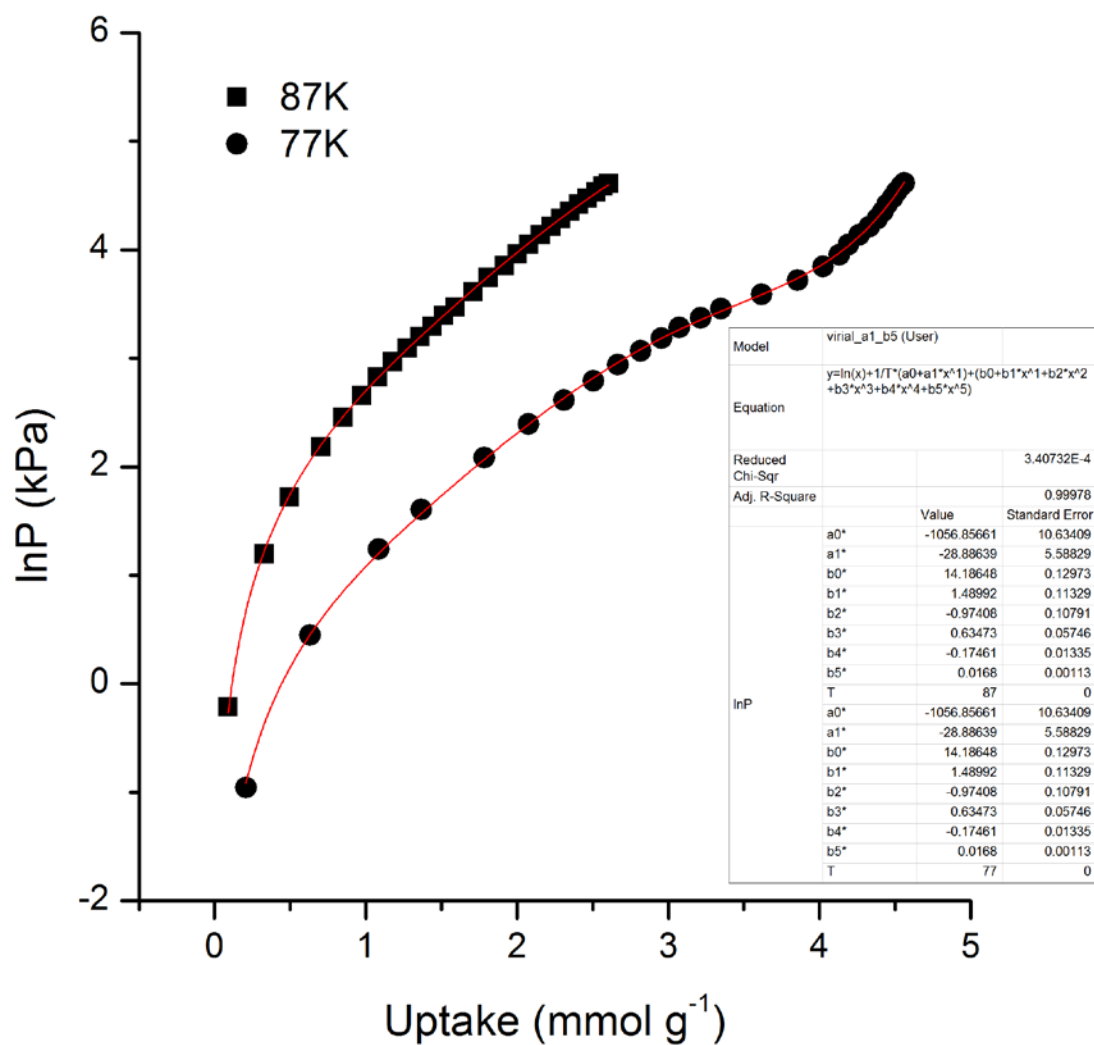

**Figure S9.** Virial fitting of the combined data for H<sub>2</sub> adsorption at 77 and 87 K (OriginPro 8.1).

## References

- [R1] J.-R. Li, Y. Ma, M. C. McCarthy, J. Sculley, J. Yub, H.-K. Jeong, P. B. Balbuena, H.-C. Zhou, *Coord. Chem. Rev.* **2011**, 255, 1791.
- [R2] H. Chun, J. Seo, *Inorg. Chem.* **2009**, 48, 9980.
- [R3] M. Xue, S. Q. Ma, Z. Jin, R. M. Schaffino, G. S. Zhu, E. B. Lobkovsky, S. L. Qiu, B. L. Chen, *Inorg. Chem.* **2008**, 47, 6825.
- [R4] J. R. Li, Y. Tao, Q. Yu, X. H. Bu, H. Sakamoto, S. Kitagawa, *Chem. Eur. J.* **2008**, 14, 2771.
- [R5] B. L. Chen, S. Q. Ma, E. J. Hurtado, E. B. Lobkovsky, H.-C. Zhou, *Inorg. Chem.* **2007**, 46, 8490.
- [R6] B. L. Chen, S. Q. Ma, F. Zapata, F. R. Fronczek, E. B. Lobkovsky, H.-C. Zhou, *Inorg. Chem.* **2007**, 46, 1233.
- [R7] M. P. Suh, Y. E. Cheon, E. Y. Lee, *Chem. Eur. J.* **2007**, 13, 4208.
- [R8] D. N. Dybtsev, H. Chun, S. H. Yoon, D. Kim, K. Kim, *J. Am. Chem. Soc.* **2004**, 126, 32.
- [R9] P. Kanoo, T. K. Maji, *Eur. J. Inorg. Chem.* **2010**, 3762.
- [R10] J.-M. Gu, T.-H. Kwon, J.-H. Park, S. Huh, *Dalton Trans.* **2010**, 39, 5608.
- [R11] D. C. Zhong, W. G. Lu, L. Jiang, X. L. Feng, T. B. Lu, *Cryst. Growth Des.* **2010**, 10, 739.
- [R12] I. H. Hwang, J. M. Bae, W.-S. Kim, Y. D. Jo, C. Kim, Y. Kim, S.-J. Kim, S. Huh, *Dalton Trans.* **2012**, 41, 12759.
- [R13] I. H. Hwang, J. M. Bae, Y.-K. Hwang, H.-Y. Kim, C. Kim, S. Huh, S.-J. Kim, Y. Kim, *Dalton Trans.* **2013**, 42, 15645.
- [R14] Y. H. Hu, L. Zhang, *Adv. Mater.* **2010**, 22, E117.

- [R15] J. L. C. Rowsell, A. R. Millward, K. S. Park, O. M. Yaghi, *J. Am. Chem. Soc.* **2004**, 126, 5666.
- [R16] J. L. Rowsell, O. M. Yaghi, *J. Am. Chem. Soc.* **2006**, 128, 1304.
- [R17] D. Kim, T. B. Lee, S. B. Choi, J. H. Yoon, J. Kim, S. H. Choi, *Chem. Phys. Lett.* **2006**, 420, 256.
- [R18] S. R. Batten, R. Robson, *Angew. Chem, Int. Ed.* **1998**, 37, 1460.
- [R19] H. Chun, D. N. Dybtsev, H. Kim, K. Kim, *Chem. Eur. J.* **2005**, 11, 3521.
- [R20] J. L. C. Rowsell, O. M. Yaghi, *Angew. Chem. Int. Ed.* **2005**, 44, 4670.
- [R21] M. Dincă, A. F. Yu, J. R. Long, *J. Am. Chem. Soc.* **2006**, 128, 8904.
- [R22] P. Krawiec, M. Kramer, M. Sabo, R. Kunschke, H. Frode, S. Kaskel, *Adv. Eng. Mater.* **2006**, 8, 293.
- [R23] J. Y. Lee, L. Pan, S. R. Kelly, J. Jagiello, T. J. Emge, J. Li, *Adv. Mater.* **2005**, 17, 2703.
- [R24] E. Y. Lee, M. P. Suh, *Angew. Chem. Int. Ed.* **2004**, 43, 2798.
- [R25] M. Dincă, J. R. Long, *J. Am. Chem. Soc.* **2005**, 127, 9376.
- [R26] S. Huh, T.-H. Kwon, N. Park, S.-J. Kim, Y. Kim, *Chem. Commun.* **2009**, 4953.
- [R27] J.-M. Gu, S.-J. Kim, Y. Kim, S. Huh, *CrystEngComm*, **2012**, 14, 1819.
